# Supplementary material for: Effect of Postoperative Prolonged sedation with Dexmedetomidine after successful reperfusion with Endovascular Thrombectomy on long-term prognosis in patients with acute ischemic stroke (PPDET): study protocol for a randomized controlled trial
Source: Springer Nature journal article supplement (doi:10.1186/s13063-024-08015-x), 2024-03-04
Supplement: MOESM1 [file 13063_2024_8015_MOESM1_ESM.pdf]

## Appendix

**Supplementary Table 1.** The modified thrombolysis in cerebral infarction scale (mTICI)

| Grade | Description                                                                                                                                                                                |
|-------|--------------------------------------------------------------------------------------------------------------------------------------------------------------------------------------------|
| 0     | No perfusion                                                                                                                                                                               |
| 1     | Antegrade reperfusion past the initial occlusion, but limited distal branch filling with little or slow distal reperfusion                                                                 |
| 2     | 2a Antegrade reperfusion of less than half of the occluded target artery previously ischemic territory (e.g., in one major division of the middle cerebral artery [MCA] and its territory) |
|       | 2b Antegrade reperfusion of more than half of the previously occluded target artery ischemic territory (e.g., in two major divisions of the MCA and their territories)                     |
| 3     | Complete antegrade reperfusion of the previously occluded target artery ischemic territory, with an absence of visualized occlusion in all distal branches                                 |

**Supplementary Table 2.** The modified Rankin Scale (mRS)

| Grade | Description                                                                                                                  |
|-------|------------------------------------------------------------------------------------------------------------------------------|
| 0     | No symptoms at all                                                                                                           |
| 1     | No significant disability despite symptoms; able to carry out all usual duties and activities                                |
| 2     | Slight disability: unable to carry out all previous activities but able to look after own affairs without assistance         |
| 3     | Moderate disability: requiring some help, but able to walk without assistance                                                |
| 4     | Moderately severe disability: unable to walk without assistance, and unable to attend to own bodily needs without assistance |
| 5     | Severe disability: bedridden, incontinent, and requiring constant nursing care and attention                                 |
| 6     | Death                                                                                                                        |

**Supplementary Table 3.** National Institute of Health Stroke Scale (NIHSS)

| Item | NIHSS         | Score                                                                                                               |
|------|---------------|---------------------------------------------------------------------------------------------------------------------|
| 1a   | LOC           | 0 = Alert<br>1 = Arousable by minor stimulation<br>2 = Arousable by strong/repeated stimulation<br>3 = Unresponsive |
| 1b   | LOC questions | 0 = Answers both correctly<br>1 = Answers one correctly<br>2 = Answers neither correctly                            |
| 1c   | LOC commands  | 0 = Performs both tasks correctly<br>1 = Performs one task correctly<br>2 = Performs neither task                   |
| 2    | Gaze          | 0 = Normal<br>1 = Partial gaze palsy<br>2 = Forced deviation                                                        |

|    |                            |                                                                                                                                                            |
|----|----------------------------|------------------------------------------------------------------------------------------------------------------------------------------------------------|
| 3  | Visual                     | 0 = Normal<br>1 = Partial hemianopia<br>2 = Complete hemianopia<br>3 = Bilateral hemianopia                                                                |
| 4  | Facial Palsy               | 0 = Normal<br>1 = Minor<br>2 = Partial<br>3 = Complete                                                                                                     |
| 5a | Motor Arm (left)           | 0 = No drift                                                                                                                                               |
| 5b | Motor Arm (right)          | 1 = Drift before 10s                                                                                                                                       |
| 6a | Motor Leg (left)           | 2 = Falls before 10s                                                                                                                                       |
| 6b | Motor Leg (right)          | 3 = No effort against gravity<br>4 = No movement<br>UN = Amputation or joint fusion                                                                        |
| 7  | Limb Ataxia                | explain:<br>0 = Absent<br>1 = In one limb<br>2 = In two limbs<br>UN = Amputation or joint fusion                                                           |
| 8  | Sensory                    | 0 = Normal<br>1 = Mild-to-Moderate loss<br>2 = Severe-to-total loss                                                                                        |
| 9  | Language                   | 0 = Normal<br>1 = Mild-to-Moderate aphasia<br>2 = Severe aphasia<br>3 = Mute or global aphasia                                                             |
| 10 | Dysarthria                 | 0 = Normal<br>1 = Mild-to-Moderate<br>2 = Severe<br>UN = Intubated                                                                                         |
| 11 | Extinction and Inattention | 0 = Normal<br><br>1 = Visual, tactile, auditory, spatial, or personal inattention<br>2 = Profound hemi-inattention or extinction to more than one modality |

**Supplementary Table 4.** The Ramsay sedation score

| Score | Description                                                                |
|-------|----------------------------------------------------------------------------|
| 1     | Awake; agitated or restless or both                                        |
| 2     | Awake; cooperative, oriented, and tranquil                                 |
| 3     | Awake but responds to commands only                                        |
| 4     | Asleep; brisk response to light glabellar tap or loud auditory stimulus    |
| 5     | Asleep; sluggish response to light glabellar tap or loud auditory stimulus |
| 6     | Asleep; no response to glabellar tap or loud auditory stimulus             |
